# Supplementary material
Source: PubMed Central journal article supplement (PMC3001236)
Supplement: supp_jn.110.131888_nut131888_T01.pdf [file supp_jn.110.131888_nut131888_T01.pdf]

## Online Supporting Material

**SUPPLEMENTAL TABLE 1.** Plasma arterial glucose and insulin concentrations in PEN pigs infused intragastrically with saline or arginine<sup>1</sup>.

| Substrate              | Arginine infusion rate ( $\mu\text{mol}\cdot\text{kg}^{-1}\cdot\text{h}^{-1}$ ) |             |             |             |             |             |             |             |
|------------------------|---------------------------------------------------------------------------------|-------------|-------------|-------------|-------------|-------------|-------------|-------------|
|                        | 100                                                                             |             | 200         |             | 400         |             | 800         |             |
|                        | Saline                                                                          | Arginine    | Saline      | Arginine    | Saline      | Arginine    | Saline      | Arginine    |
| Glucose, <i>mmol/L</i> | 7.15 ± 0.21                                                                     | 7.22 ± 0.23 | 7.48 ± 0.36 | 7.61 ± 0.23 | 6.80 ± 0.11 | 7.12 ± 0.41 | 7.27 ± 0.15 | 7.02 ± 0.31 |
| Insulin, <i>nmol/L</i> | 32 ± 7                                                                          | 21 ± 5      | 54 ± 12     | 25 ± 4      | 24 ± 4      | 27 ± 5      | 32 ± 6      | 22 ± 4      |

<sup>1</sup>Means ± SEM, *n*= 9-11 pigs per group.

## Online Supporting Material

**SUPPLEMENTAL TABLE 2.** SMA flows during saline infusion and each time interval in response to arginine dose in pigs TPN or PEN pigs<sup>1</sup>

| Treatment                                                                 | Saline      | 1 h         | 2 h         | 3 h         |
|---------------------------------------------------------------------------|-------------|-------------|-------------|-------------|
| <i>L·kg<sup>-1</sup>·h<sup>-1</sup></i>                                   |             |             |             |             |
| TPN group                                                                 |             |             |             |             |
| Arginine dose<br>( $\mu\text{mol}\cdot\text{kg}^{-1}\cdot\text{h}^{-1}$ ) |             |             |             |             |
| 50                                                                        | 1.52 ± 0.34 | 1.48 ± 0.20 | 1.35 ± 0.26 | 1.41 ± 0.29 |
| 100                                                                       | 1.04 ± 0.13 | 1.09 ± 0.13 | 1.07 ± 0.13 | 1.11 ± 0.15 |
| 200                                                                       | 1.20 ± 0.18 | 1.30 ± 0.24 | 1.17 ± 0.22 | 1.17 ± 0.19 |
| 400                                                                       | 1.42 ± 0.48 | 1.48 ± 0.42 | 1.49 ± 0.43 | 1.43 ± 0.42 |
| 800                                                                       | 1.57 ± 0.23 | 1.53 ± 0.11 | 1.48 ± 0.18 | 1.68 ± 0.20 |
| PEN group                                                                 |             |             |             |             |
| Arginine dose<br>( $\mu\text{mol}\cdot\text{kg}^{-1}\cdot\text{h}^{-1}$ ) |             |             |             |             |
| 100                                                                       | 2.08 ± 0.21 | 2.34 ± 0.35 | 2.41 ± 0.21 | 2.55 ± 0.31 |
| 200                                                                       | 2.24 ± 0.35 | 2.49 ± 0.47 | 2.40 ± 0.46 | 2.50 ± 0.53 |
| 400                                                                       | 2.39 ± 0.39 | 2.87 ± 0.51 | 2.71 ± 0.63 | 2.32 ± 0.43 |
| 800                                                                       | 2.77 ± 0.56 | 2.77 ± 0.60 | 2.89 ± 0.63 | 2.65 ± 0.54 |

<sup>1</sup>Means ± SEM, *n*=3-5 pigs per TPN group and *n*=5-7 pigs per PEN group.
